# Supplementary material
Source: PubMed Central journal article supplement (PMC3521789)
Supplement: 12_242_Li.Suppl.pdf [file 12_242_Li.Suppl.pdf]

Supplemental Data

Long-term Safety and Efficacy of Human-Induced Pluripotent Stem Cell (iPS) Grafts in a Preclinical Model of Retinitis Pigmentosa

Yao Li,<sup>1,2\*</sup> Yi-Ting Tsai,<sup>1,2\*</sup> Chun-Wei Hsu,<sup>1,2</sup> Deniz Erol,<sup>1,2</sup> Jin Yang,<sup>1,2</sup> Wen-Hsuan Wu,<sup>1,2</sup> Richard J Davis,<sup>1,2</sup> Dieter Egli,<sup>3</sup> and Stephen H Tsang<sup>1,2,4,5</sup>

Online address: <http://www.molmed.org>

The Feinstein Institute for Medical Research North Shore LIJ

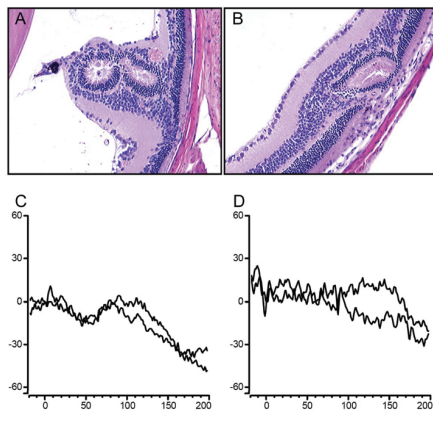

**Supplementary Figure S1.** (A) Maximum ERG responses of an untreated right and an untreated left eye in a *Rpe65<sup>rd12</sup>/Rpe65<sup>rd12</sup>* mouse at three weeks of age. The average standard deviation of b-wave peaks between right and left eyes was less than 5% of the mean (n = 3). (B) Right/left eye differences (b-wave enhancement) measured from mitomycin-ES and iPS-RPE treatments, compared to untreated eyes (no treatment). No significant differences between right and left eyes of untreated *Rpe65<sup>rd12</sup>/Rpe65<sup>rd12</sup>* mice were detected ( $p = 0.8009$ , n = 3). iPS-RPE treated eyes show a 13.7 microvolt difference ( $p = 0.0246$ , n = 7). Mice receiving mitomycin-C treated ES cells (mito-C ES) fail to show statistically significant differences ( $p = 0.2853$ , n = 6). The values shown are the means  $\pm$  SEM and the  $p$  values  $t$  tests.

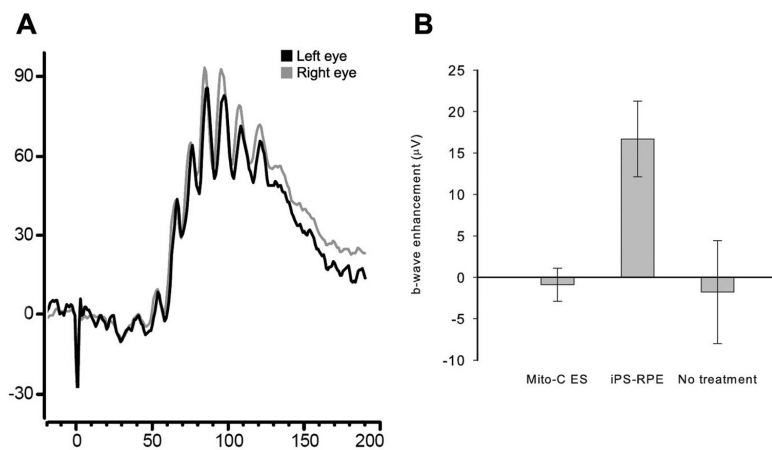

**Supplementary Figure S2.** (A, B). Two injected eyes with evidence of surgical trauma. (C, D) Examples of maximum ERG responses for treated (black trace) and untreated (grey trace) eyes. Panel D shows an instance of suspected surgical trauma in the treated eye.
